# Supplementary material
Source: HighWire-hosted journal article supplement (https://tobaccocontrol.bmj.com/content/26/1/10)
Supplement: inline-supplementary-material-2 [file inline-supplementary-material-2.pdf]

**Table S2: Summary of 92 Electronic Nicotine Delivery System Overheating/Fire/Explosion Events in the U.S.**

| *Recipient by Reporter [in-text reference number] | Date | Event Setting in State | Product(s) | Precedent Activities and Perceived Harbingers | Event Type or Description | Injury or Health Effect | Affected or Involved's Age in Years, Gender, User Status (when known) | Fire or Property Damage Description and Control Measures | Postulated Cause(s) and Response(s) |
|---------------------------------------------------|------|------------------------|------------|-----------------------------------------------|---------------------------|-------------------------|-----------------------------------------------------------------------|----------------------------------------------------------|-------------------------------------|
|---------------------------------------------------|------|------------------------|------------|-----------------------------------------------|---------------------------|-------------------------|-----------------------------------------------------------------------|----------------------------------------------------------|-------------------------------------|

**Events Reported in Media Sources**

|                                                                               |                           |                                |                                                                                                  |                                   |                                         |                                                                                                                                                                                                                                                                                  |                        |                                                                                                                                          |                                                                                                                                                                                                                                                                                  |
|-------------------------------------------------------------------------------|---------------------------|--------------------------------|--------------------------------------------------------------------------------------------------|-----------------------------------|-----------------------------------------|----------------------------------------------------------------------------------------------------------------------------------------------------------------------------------------------------------------------------------------------------------------------------------|------------------------|------------------------------------------------------------------------------------------------------------------------------------------|----------------------------------------------------------------------------------------------------------------------------------------------------------------------------------------------------------------------------------------------------------------------------------|
| News by Hood[25]                                                              | Event Jan 2012            | Home in Colorado               | Prodigy V3.1 electronic cigarette from Pure Enterprises<br><br>Enercell battery from Radio Shack | Purchased device in November 2011 | Explosion while using followed by Fire. | Product exploded, sending burning debris and battery acid into mouth, face and eyes. Hospitalized for eight days. Lawsuit seeks damages for "...medical care and treatment... pain, suffering, disability, disfigurement, anxiety, depression, and loss of enjoyment of life..." | Unknown age, Male User | Lawsuit seeks "... property damages for fire damage and loss of use of his residence."                                                   | Lawsuit alleges that retailer "failed to adequately warn purchasers of the dangers"                                                                                                                                                                                              |
| News: Are smokeless cigarettes safer? [26]<br><br>News by CBS News Staff [27] | Event 15 Feb 2012 [26,27] | Home office in Florida [26,27] | Rechargeable cigar-sized device[27]<br><br>Recharge-able lithium battery[27]                     | Unknown                           | Explosion in mouth during use.[26,27]   | Facial burns, lost part of tongue and several teeth. Care in local hospital, followed by burn center hospitalization.[26,27]                                                                                                                                                     | 57, Male User[26,27]   | Carpet and chair cushions burned.[26] Pictures and office equipment also burned.[27]<br><br>Housemates extinguished fire using salt.[27] | Tobacco Vapor Electronic Cigarette Association spokesperson "...believed device was not the commonly sold kind, but a specially modified device designed to give the user a turbo-charged blast of nicotine." [26,27]<br><br>Fire officials said there was a faulty battery.[27] |

**Table S2: Summary of 92 Electronic Nicotine Delivery System Overheating/Fire/Explosion Events in the U.S.**

| *Recipient by Reporter [in-text reference number]                | Date              | Event Setting in State       | Product(s)                                                                  | Precedent Activities and Perceived Harbingers        | Event Type or Description                                     | Injury or Health Effect                                                                                                                                                                                                                                                                                      | Affected or Involved's Age in Years, Gender, User Status (when known) | Fire or Property Damage Description and Control Measures                                                  | Postulated Cause(s) and Response(s)                                                                                                                          |
|------------------------------------------------------------------|-------------------|------------------------------|-----------------------------------------------------------------------------|------------------------------------------------------|---------------------------------------------------------------|--------------------------------------------------------------------------------------------------------------------------------------------------------------------------------------------------------------------------------------------------------------------------------------------------------------|-----------------------------------------------------------------------|-----------------------------------------------------------------------------------------------------------|--------------------------------------------------------------------------------------------------------------------------------------------------------------|
| News: Electronic cigarette explodes in Muskogee woman's hand[28] | Event 15 Apr 2012 | Home living room in Oklahoma | OneJoy NJOY electronic cigarette                                            | Brand new device                                     | Explosion when opening original package.                      | Blast affected hearing in right ear and vision in left eye.                                                                                                                                                                                                                                                  | Unknown age, Female, User                                             | Knocked 15-pound salt lamp from shelf and shattered the light bulb. Knocked decoration off opposite wall. | Manufacturer offered to collect accused product and provide refund.                                                                                          |
| News by Downing[29]                                              | Event Nov 2012    | Unknown setting in Texas     | Rechargeable U.S.-made electronic cigarette<br><br>USB charger with MacBook | Product placed on charge for two hours before event. | Explosion while charging and in user's hand followed by Fire. | User treated for second and third degree burns and smoke inhalation, with persistent finger numbness eight months later.<br><br>Wife suffered from smoke inhalation.                                                                                                                                         | Unknown age, Male User;<br><br>And<br><br>Unknown age Female          | Unknown                                                                                                   | User complained that the product had no instructions for how long to charge and no warnings.<br><br>Manufacturer pursuing whether product was a "knock off." |
| News by Romboy[30]                                               | Event 1 Feb 2013  | Home in Utah                 | Prodigy V3.1 electronic cigarette by Pure Enterprises                       | Product purchased Oct 2011                           | Explosion during use followed by Fire.                        | Product exploded in user's face, sending burning debris and battery acid into the mouth, face and eyes. Hair caught on fire. Ambulance transport to University Hospital for ten-day stay. Lawsuit alleges "...pain, suffering, disability, disfigurement, anxiety, depression, loss of enjoyment of life..." | Unknown age, Male User                                                | Lawsuit alleges "...loss of the use of his home..."                                                       | Unknown cause<br><br>Lawsuit                                                                                                                                 |

**Table S2: Summary of 92 Electronic Nicotine Delivery System Overheating/Fire/Explosion Events in the U.S.**

| *Recipient by Reporter [in-text reference number]                         | Date              | Event Setting in State                             | Product(s)                                                                           | Precedent Activities and Perceived Harbingers                                                           | Event Type or Description                                                | Injury or Health Effect                                                    | Affected or Involved's Age in Years, Gender, User Status (when known) | Fire or Property Damage Description and Control Measures                                          | Postulated Cause(s) and Response(s)                                                                                                                                                                                                                                     |
|---------------------------------------------------------------------------|-------------------|----------------------------------------------------|--------------------------------------------------------------------------------------|---------------------------------------------------------------------------------------------------------|--------------------------------------------------------------------------|----------------------------------------------------------------------------|-----------------------------------------------------------------------|---------------------------------------------------------------------------------------------------|-------------------------------------------------------------------------------------------------------------------------------------------------------------------------------------------------------------------------------------------------------------------------|
| News: Corona couple sues after e-cigarette battery explodes in car[31]    | Event Mar 2013    | Occupied moving car in California                  | Rechargeable VapCigs e-cigarette<br><br>Car charger                                  | Product placed on charge for unspecified duration.<br><br>Smell like nail polish plus battery dripping. | As user was unscrewing device from charger – Fire followed by Explosion. | Second degree burns on upper thighs and lower buttocks                     | Unknown age, Female User                                              | Flame ignited woman's dress and passenger seat.<br><br>Extinguished with coffee.                  | Lawsuit against retailer and manufacturer for selling an unsafe product. [31]<br><br>Award of \$1.9million from law suit against distributor, wholesaler and retailer alleging that all were involved in the distribution of a an unsafe product with no warnings.[139] |
| News: Police: 'Explosion' at apartment complex came from e-cigarette [32] | Event 16 Apr 2013 | Under desk in apartment complex office in Oklahoma | E-cigarette<br><br>Lithium battery                                                   | Unknown                                                                                                 | Overheating followed by Explosion.                                       | One employee taken to the hospital in good condition for smoke inhalation. | Unknown age, Female                                                   | Firefighters and hazmat unit responded.<br><br>No evacuations.                                    | Unknown                                                                                                                                                                                                                                                                 |
| News by Reiser[33]                                                        | Event 24 Apr 2013 | Parked unoccupied car in Arizona                   | Rechargeable Ego-T<br><br>Small lithium battery<br><br>Car cigarette lighter charger | Product unattended while charging for more than two hours                                               | Explosion while charging followed by Fire.                               | No information                                                             | Unknown age, Female                                                   | Device tip projectile landed in, smoldered, and ignited back seat.<br><br>Firefighters responded. | Fire investigator said battery exploded.<br><br>Affected family sought to warn other people.                                                                                                                                                                            |

**Table S2: Summary of 92 Electronic Nicotine Delivery System Overheating/Fire/Explosion Events in the U.S.**

| *Recipient by Reporter [in-text reference number]             | Date                      | Event Setting in State   | Product(s)                                           | Precedent Activities and Perceived Harbingers                                                         | Event Type or Description                   | Injury or Health Effect | Affected or Involved's Age in Years, Gender, User Status (when known) | Fire or Property Damage Description and Control Measures                                                    | Postulated Cause(s) and Response(s)                                                                                                                                                                  |
|---------------------------------------------------------------|---------------------------|--------------------------|------------------------------------------------------|-------------------------------------------------------------------------------------------------------|---------------------------------------------|-------------------------|-----------------------------------------------------------------------|-------------------------------------------------------------------------------------------------------------|------------------------------------------------------------------------------------------------------------------------------------------------------------------------------------------------------|
| News: Tulsa man's e-cigarette catches fire while charging[34] | Report 7 Jun 2013         | Home kitchen in Oklahoma | Rechargeable e-cig<br><br>Laptop charger             | Purchased device two months earlier. "Huge flash" while plugged into laptop for unspecified duration. | Fire while charging in laptop.              | No information          | Unknown, Male User                                                    | Laptop, lamp and shades ignited.<br><br>Occupant called fire department.                                    | User requested retailer refund.<br><br>User planned to research "who to buy from" and to "not go back to the real thing."<br><br>Retailer began warning subsequent customers to use correct charger. |
| News by Navarrete [35]                                        | Event 1 Jul 2013          | Car in Utah              | Rechargeable electronic cigarette<br><br>Car charger | Product placed on charge for unspecified duration.                                                    | Fire while charging.                        | No information          | Unknown, Female User                                                  | Car caught fire and was "badly damaged."                                                                    | Unknown                                                                                                                                                                                              |
| News by Chaney[36]                                            | Report 1 Aug 2013         | Home in Oklahoma         | Rechargeable e-cigarette<br><br>Wall charger         | Product placed on charge 15 minutes before event.                                                     | Explosion while charging. followed by Fire. | No information          | Unknown, Female User                                                  | Projectile hit wall and carpet, igniting three areas.<br><br>User extinguished fires with a glass of water. | User claimed distributor told her any charger would work with her device.<br><br>User planned "cold turkey" to "kick the habit."                                                                     |
| News by Proulx[37]                                            | Event week of 25 Aug 2013 | Home in New York         | Rechargeable electronic cigarette                    | Product placed on charge for unspecified duration before event.                                       | Explosion while charging followed by Fire.  | No injuries             | Unknown                                                               | Heavy smoke and water damage.<br><br>Firefighters extinguished flames in 15 minutes.                        | The Fire Marshal ruled the fire accidental.                                                                                                                                                          |

**Table S2: Summary of 92 Electronic Nicotine Delivery System Overheating/Fire/Explosion Events in the U.S.**

| *Recipient by Reporter [in-text reference number]                                                                                    | Date                                        | Event Setting in State  | Product(s)                                                                                             | Precedent Activities and Perceived Harbingers                                                     | Event Type or Description                                                                   | Injury or Health Effect | Affected or Involved's Age in Years, Gender, User Status (when known) | Fire or Property Damage Description and Control Measures                                                                                    | Postulated Cause(s) and Response(s)                                                                                                                                                                                                                                                                                          |
|--------------------------------------------------------------------------------------------------------------------------------------|---------------------------------------------|-------------------------|--------------------------------------------------------------------------------------------------------|---------------------------------------------------------------------------------------------------|---------------------------------------------------------------------------------------------|-------------------------|-----------------------------------------------------------------------|---------------------------------------------------------------------------------------------------------------------------------------------|------------------------------------------------------------------------------------------------------------------------------------------------------------------------------------------------------------------------------------------------------------------------------------------------------------------------------|
| News by Navarrete [35]                                                                                                               | Event 26 Aug 2013                           | Apartment in Arizona    | Rechargeable Smokein T electronic cigarette<br><br>Wall charger                                        | Product placed on charge for unspecified duration.<br><br>Smoke detector alarm wakened occupants. | Fire while charging.                                                                        | No information          | 22, Male User                                                         | Carpet ignited.                                                                                                                             | "The company" offered replacement product.<br><br>User is stopping all forms of "smoking."                                                                                                                                                                                                                                   |
| News by Strickland [38]<br><br>News: Elizabeth Wilkowski, Atlanta woman, claims e-cigarette explosions almost destroyed her home[39] | Reports 2 Sep 2013 [38] and 4 Sep 2013 [39] | Home in Georgia [38,39] | Rechargeable E-hit brand e-cigarette by Seego in China[39]<br><br>Charging in computer USB port[38,39] | Product placed on charge for unspecified duration.                                                | Explosion while charging (sounded like a bomb and shook walls[39]) followed by Fire.[38,39] | No information [38,39]  | Unknown age, Female, User[38,39]                                      | Scorch mark on couch[38] or couch caught fire.[39]<br><br>Hole burned in rug.[38,39]<br><br>Charred rag she had used to unplug product.[38] | Manufacturer said it had stopped producing this product model three months earlier (although it was still shown on their website) and that the wrong charger had been used based on photographs and videos in news stories. [39]<br><br>Retailer stopped carrying this brand and offered replacement with another brand.[38] |

**Table S2: Summary of 92 Electronic Nicotine Delivery System Overheating/Fire/Explosion Events in the U.S.**

| *Recipient by Reporter [in-text reference number] | Date | Event Setting in State | Product(s) | Precedent Activities and Perceived Harbingers | Event Type or Description | Injury or Health Effect | Affected or Involved's Age in Years, Gender, User Status (when known) | Fire or Property Damage Description and Control Measures | Postulated Cause(s) and Response(s) |
|---------------------------------------------------|------|------------------------|------------|-----------------------------------------------|---------------------------|-------------------------|-----------------------------------------------------------------------|----------------------------------------------------------|-------------------------------------|
|---------------------------------------------------|------|------------------------|------------|-----------------------------------------------|---------------------------|-------------------------|-----------------------------------------------------------------------|----------------------------------------------------------|-------------------------------------|

|                              |                    |                              |                                                           |                                                                                                                             |                                            |                |                          |                                                                  |         |
|------------------------------|--------------------|------------------------------|-----------------------------------------------------------|-----------------------------------------------------------------------------------------------------------------------------|--------------------------------------------|----------------|--------------------------|------------------------------------------------------------------|---------|
| News sub story by McFall[40] | Report 24 Sep 2013 | Unknown setting in Utah      | Rechargeable e-cigarette                                  | Product placed on charge for unspecified duration.                                                                          | Explosion while charging followed by Fire. | No injuries    | Unknown                  | Projectile landed in laundry basket, igniting the laundry.       | Unknown |
| News by Wasserman [41]       | Report 1 Oct 2013  | Home in Minnesota            | Rechargeable e-cig<br><br>Plugged into computer to charge | Product placed on charge for unspecified duration.<br><br>Started sparking "like a fountain firework" seconds before event. | Explosion while charging followed by Fire. | No information | Unknown age, Male User   | Projectile landed on and burned carpet.                          | Unknown |
| News by Christie[42]         | Event 1 Oct 2013   | Unknown setting in Wisconsin | Rechargeable e-cigarette                                  | Product placed on charge for unspecified duration.                                                                          | Explosion while charging followed by Fire. | No information | Unknown age, Female User | Projectile launched 25 feet from the charger and started a fire. | Unknown |

**Table S2: Summary of 92 Electronic Nicotine Delivery System Overheating/Fire/Explosion Events in the U.S.**

| *Recipient by Reporter [in-text reference number] | Date | Event Setting in State | Product(s) | Precedent Activities and Perceived Harbingers | Event Type or Description | Injury or Health Effect | Affected or Involved's Age in Years, Gender, User Status (when known) | Fire or Property Damage Description and Control Measures | Postulated Cause(s) and Response(s) |
|---------------------------------------------------|------|------------------------|------------|-----------------------------------------------|---------------------------|-------------------------|-----------------------------------------------------------------------|----------------------------------------------------------|-------------------------------------|
|---------------------------------------------------|------|------------------------|------------|-----------------------------------------------|---------------------------|-------------------------|-----------------------------------------------------------------------|----------------------------------------------------------|-------------------------------------|

|                        |                                 |                 |                                                           |                                                                                     |                                                            |                                                          |                          |                                                                                                                                                                                                                                                              |                                                                                                                               |
|------------------------|---------------------------------|-----------------|-----------------------------------------------------------|-------------------------------------------------------------------------------------|------------------------------------------------------------|----------------------------------------------------------|--------------------------|--------------------------------------------------------------------------------------------------------------------------------------------------------------------------------------------------------------------------------------------------------------|-------------------------------------------------------------------------------------------------------------------------------|
| News by McCurdy [43]   | Event 3 Oct 2013                | Home in Florida | Rechargeable electronic cigarette<br><br>Wall/USB charger | Product placed on charge for 10 minutes before event.<br><br>Loud sound like a gun. | Explosion while charging followed by Fire.                 | No injuries - three adults and a child evacuated safely. | Unknown age, Female User | Projectile travelled 3.5 feet and ignited curtains. Occupant tried unsuccessfully to use fire extinguisher and blanket to extinguish the fire- then removed the curtains to outdoors.<br><br>Firefighters extinguished the fire. Damages estimated at \$100. | Unknown                                                                                                                       |
| News by Thomas R. [44] | Event "days before" 16 Oct 2013 | Home in Arizona | Rechargeable Smokin' T E-cigarette cartridge              | Product placed on charge for 20 minutes.                                            | Overheating while charging followed by Explosion and Fire. | No information                                           | Unknown age, Female User | Scorched carpet                                                                                                                                                                                                                                              | User bought exact replacement product, thinking the first product was faulty. Days later had a more serious event. [44,45,46] |

**Table S2: Summary of 92 Electronic Nicotine Delivery System Overheating/Fire/Explosion Events in the U.S.**

| *Recipient by Reporter [in-text reference number]                                | Date                  | Event Setting in State             | Product(s)                                                     | Precedent Activities and Perceived Harbingers                                                                                                      | Event Type or Description                                                          | Injury or Health Effect                                                                                                                         | Affected or Involved's Age in Years, Gender, User Status (when known) | Fire or Property Damage Description and Control Measures                                                                                                                           | Postulated Cause(s) and Response(s)                                                                                                                                                                              |
|----------------------------------------------------------------------------------|-----------------------|------------------------------------|----------------------------------------------------------------|----------------------------------------------------------------------------------------------------------------------------------------------------|------------------------------------------------------------------------------------|-------------------------------------------------------------------------------------------------------------------------------------------------|-----------------------------------------------------------------------|------------------------------------------------------------------------------------------------------------------------------------------------------------------------------------|------------------------------------------------------------------------------------------------------------------------------------------------------------------------------------------------------------------|
| News by Thomas R.[44]<br><br>News by Gilger[45]<br><br>News by Gilger et al.[46] | Event 16 Oct 2013[44] | Home bedroom in Arizona [44,45,46] | Rechargeable Smokin' T E-cigarette [44,45,46]                  | Plugged device into charger 20 minutes before the event.[44] Put charging product on top of bed and left. [45,46] Smoke detector alerted them.[45] | Overheating while charging [45,46] followed by explosion [44] and Fire. [44,45,46] | Nonuser went back inside evacuated house to rescue dogs and suffered smoke inhalation requiring a three-day burn center hospitalization.[44,45] | Unknown age, Male Nonuser [44,45]                                     | Fire gutted bedroom, with smoke and water damage to much of house.[44]<br><br>Damages estimated over \$100,000 USD. [45] Occupants were living in a hotel two months later.[45,46] | Injured nonuser complained about having no instructions for how long to charge[45,46] and having no warnings.[44,45,46]<br><br>Fire investigator said product cartridge overheated and sparked the fire [45,46]. |
| News by Shukhnov [47]                                                            | Report 5 Nov 2013     | Home in Idaho                      | Rechargeable electronic cigarette<br><br>Plugged into a laptop | Product placed on charge for unspecified duration.<br><br>Smoke alarm awakened sleeping family.                                                    | Overheating led to explosion while charging followed by Fire                       | No information                                                                                                                                  | Unknown                                                               | Projectiles ignited furniture.<br><br>Occupants extinguished "living room blaze" with fire extinguisher.                                                                           | Fire investigator said battery overcharged and overheated.                                                                                                                                                       |



**Table S2: Summary of 92 Electronic Nicotine Delivery System Overheating/Fire/Explosion Events in the U.S.**

| *Recipient by Reporter [in-text reference number] | Date | Event Setting in State | Product(s) | Precedent Activities and Perceived Harbingers | Event Type or Description | Injury or Health Effect | Affected or Involved's Age in Years, Gender, User Status (when known) | Fire or Property Damage Description and Control Measures | Postulated Cause(s) and Response(s) |
|---------------------------------------------------|------|------------------------|------------|-----------------------------------------------|---------------------------|-------------------------|-----------------------------------------------------------------------|----------------------------------------------------------|-------------------------------------|
|---------------------------------------------------|------|------------------------|------------|-----------------------------------------------|---------------------------|-------------------------|-----------------------------------------------------------------------|----------------------------------------------------------|-------------------------------------|

|                    |                    |                                 |                                                                   |                                                                                     |                                            |                |                          |                                                                                                                                           |                                                                           |
|--------------------|--------------------|---------------------------------|-------------------------------------------------------------------|-------------------------------------------------------------------------------------|--------------------------------------------|----------------|--------------------------|-------------------------------------------------------------------------------------------------------------------------------------------|---------------------------------------------------------------------------|
| News by Trent[48]  | Report 11 Nov 2013 | Home in Arizona                 | Crown Seven Gladiator electronic cigarette<br><br>Lithium battery | Device was four days old.<br><br>Product placed on charge for unspecified duration. | Explosion while charging followed by Fire. | No information | Unknown age, Male User   | Projectile hit a window and fell to the floor, igniting carpet.<br><br>Fire "spread quickly" and was extinguished using a glass of water. | Manufacturer said device and charger used were not theirs.                |
| News by Gatton[49] | Report 11 Nov 2013 | Unoccupied parked car in Oregon | RechargeableE-cigarette<br><br>Car cigarette lighter charger      | Product placed on charge for two hours.                                             | Explosion while charging followed by Fire. | No information | Unknown age, Female User | Projectile landed in back seat. Extensive damage to stereo system and interior of truck.                                                  | Unknown                                                                   |
| News by Craig[50]  | Report 24 Nov 2013 | Home in Michigan                | Rechargeable Bull Dog Vaporizer<br><br>Wall charger               | Product placed on charge for unspecified duration.                                  | Explosion while charging followed by Fire. | No information | Unknown, Female User     | Projectile scorched hardwood flooring.<br><br>User extinguished fire.                                                                     | Retailer stated that this was the first event in seven years of business. |

**Table S2: Summary of 92 Electronic Nicotine Delivery System Overheating/Fire/Explosion Events in the U.S.**

| *Recipient by Reporter [in-text reference number] | Date | Event Setting in State | Product(s) | Precedent Activities and Perceived Harbingers | Event Type or Description | Injury or Health Effect | Affected or Involved's Age in Years, Gender, User Status (when known) | Fire or Property Damage Description and Control Measures | Postulated Cause(s) and Response(s) |
|---------------------------------------------------|------|------------------------|------------|-----------------------------------------------|---------------------------|-------------------------|-----------------------------------------------------------------------|----------------------------------------------------------|-------------------------------------|
|---------------------------------------------------|------|------------------------|------------|-----------------------------------------------|---------------------------|-------------------------|-----------------------------------------------------------------------|----------------------------------------------------------|-------------------------------------|

|                                                |                    |                          |                                                         |                                                                                                                 |                                                              |                              |                        |                                                                                                        |                                                                                                                                                                                                                                       |
|------------------------------------------------|--------------------|--------------------------|---------------------------------------------------------|-----------------------------------------------------------------------------------------------------------------|--------------------------------------------------------------|------------------------------|------------------------|--------------------------------------------------------------------------------------------------------|---------------------------------------------------------------------------------------------------------------------------------------------------------------------------------------------------------------------------------------|
| News: E-cigarette blamed for mattress fire[51] | Report 28 Nov 2013 | Home bedroom in Colorado | Rechargeable Foos e-cigarette                           | Product was on the floor while charging and unattended for an unspecified duration. User heard a strange noise. | Explosion while charging followed by Fire.                   | Burns to arm, hands and face | Unknown age, Male User | Smoke alarms rang & user found projectiles had ignited bed.<br><br>User smothered flames with blanket. | User said device overcharged.<br><br>User went back to "normal cigarettes."<br><br>Manufacturer said this was the first event for this product and they would pay for damages if all experts agreed the accused product was at fault. |
| News by DeMasters [52]                         | Event 9 Dec 2013   | Home in Utah             | Rechargeable e-cigarette<br><br>USB charger in computer | Product placed on charge for unspecified duration.                                                              | Overheating followed by explosion while charging, then Fire. | No injuries                  | Unknown                | Projectile landed across the room, leaving a black mark on the wall.                                   | Unknown                                                                                                                                                                                                                               |

**Table S2: Summary of 92 Electronic Nicotine Delivery System Overheating/Fire/Explosion Events in the U.S.**

| *Recipient by Reporter [in-text reference number]  | Date                                                            | Event Setting in State            | Product(s)                                                                                                                      | Precedent Activities and Perceived Harbingers                                                     | Event Type or Description                                                                                  | Injury or Health Effect                                                                                              | Affected or Involved's Age in Years, Gender, User Status (when known) | Fire or Property Damage Description and Control Measures                                                             | Postulated Cause(s) and Response(s)                                                                                                                                    |
|----------------------------------------------------|-----------------------------------------------------------------|-----------------------------------|---------------------------------------------------------------------------------------------------------------------------------|---------------------------------------------------------------------------------------------------|------------------------------------------------------------------------------------------------------------|----------------------------------------------------------------------------------------------------------------------|-----------------------------------------------------------------------|----------------------------------------------------------------------------------------------------------------------|------------------------------------------------------------------------------------------------------------------------------------------------------------------------|
| News by Kurwicki[53]<br><br>News by Thomas C. [54] | Event 10 Dec 2013 [53]<br><br>Follow-up report 11 Jan 2014 [54] | Unknown in North Carolina [53,54] | Buckeye Vapors e-liquid containing propylene glycol, alcohol [53,54], glycerin and nicotine[53]<br><br>"Pipe-shaped device"[54] | Had been using an e-cigarette for 10 weeks.[53]<br><br>Heard a "little pop" at time of event.[53] | "E-cig erupted" after taking a puff. [53,54] Hot oil from the device tip shot into the user's eye. [53,54] | Burn and damaged vision in one eye. [53]<br><br>Pain and temporary blindness.[54]<br><br>Hospitalized overnight.[54] | 54, Male User[53,54]                                                  | Unknown                                                                                                              | User said the menthol caused the burning sensation.[53]<br><br>User was pursuing legal action against the manufacturer of both the e-cig and the "liquid flavor." [53] |
| News by Landis & Foster[55]                        | Event 23 Dec 2013                                               | Home bedroom in Missouri          | Rechargeable e-cig<br><br>Laptop USB charger                                                                                    | Product placed on charge for unspecified duration.<br><br>Product emitted smoke or steam.         | Overheating while charging followed by Fire, then Explosion.                                               | Pain and second- degree burns to one leg and foot.<br><br>Emergency room care and "took weeks to recover."           | Unknown age, Male User                                                | Projectiles ignited bed, burned through king-sized mattress down to box springs.<br><br>Occupants extinguished fire. | Injured user stated he probably used the wrong charger.<br><br>User plans to try nicotine replacement therapy.                                                         |

**Table S2: Summary of 92 Electronic Nicotine Delivery System Overheating/Fire/Explosion Events in the U.S.**

| *Recipient by Reporter [in-text reference number] | Date | Event Setting in State | Product(s) | Precedent Activities and Perceived Harbingers | Event Type or Description | Injury or Health Effect | Affected or Involved's Age in Years, Gender, User Status (when known) | Fire or Property Damage Description and Control Measures | Postulated Cause(s) and Response(s) |
|---------------------------------------------------|------|------------------------|------------|-----------------------------------------------|---------------------------|-------------------------|-----------------------------------------------------------------------|----------------------------------------------------------|-------------------------------------|
|---------------------------------------------------|------|------------------------|------------|-----------------------------------------------|---------------------------|-------------------------|-----------------------------------------------------------------------|----------------------------------------------------------|-------------------------------------|

|                                                                |                         |                           |                                                                   |                                                                                       |                                                                   |                 |                        |                                                                                                                                                                             |                |
|----------------------------------------------------------------|-------------------------|---------------------------|-------------------------------------------------------------------|---------------------------------------------------------------------------------------|-------------------------------------------------------------------|-----------------|------------------------|-----------------------------------------------------------------------------------------------------------------------------------------------------------------------------|----------------|
| News by Sanchez[56]                                            | Event month of Jan 2014 | Home in Arizona           | Rechargeable eGo from China<br><br>USB charger in laptop computer | Product placed on charge for 20 minutes, while user went outdoors<br><br>Heard a pop. | Explosion while charging followed by Fire.                        | No information  | Unknown age, Male User | Projectile shot across table and landed in loveseat which ignited.                                                                                                          | Unknown        |
| News by KGW Staff [57]<br><br>News by The Associated Press[58] | Reports 3 Mar 2014      | Unknown in Oregon [57,58] | Electronic cigarette<br><br>Lithium battery [57,58]               | Product placed on charge for unspecified duration. [57,58]                            | Overheating while charging followed by explosion and Fire.[57,58] | No injuries[57] | Unknown [57,58]        | Projectiles sent bits of burning battery into the ceiling and walls. [57,58]<br><br>Hot piece of battery landed on pillow, which smoldered and filled house with smoke.[58] | Unknown[57,58] |
| News by KGW Staff [57]<br><br>News by The Associated Press[58] | Reports 3 Mar 2014      | Unknown in Oregon [57,58] | Electronic cigarette<br><br>Lithium battery [57,58]               | Product placed on charge for unspecified duration. [57,58]                            | Overheating during charging followed by Fire.[57,58]              | No injuries[57] | Unknown [57,58]        | Mattress ignited. [57,58]<br><br>Resident extinguished fire.[58]                                                                                                            | Unknown[57,58] |

**Table S2: Summary of 92 Electronic Nicotine Delivery System Overheating/Fire/Explosion Events in the U.S.**

| *Recipient by Reporter [in-text reference number] | Date | Event Setting in State | Product(s) | Precedent Activities and Perceived Harbingers | Event Type or Description | Injury or Health Effect | Affected or Involved's Age in Years, Gender, User Status (when known) | Fire or Property Damage Description and Control Measures | Postulated Cause(s) and Response(s) |
|---------------------------------------------------|------|------------------------|------------|-----------------------------------------------|---------------------------|-------------------------|-----------------------------------------------------------------------|----------------------------------------------------------|-------------------------------------|
|---------------------------------------------------|------|------------------------|------------|-----------------------------------------------|---------------------------|-------------------------|-----------------------------------------------------------------------|----------------------------------------------------------|-------------------------------------|

|                                             |                   |                            |                                              |                                                                               |                      |                                                                                                                                                                                                                           |                          |                                                                                                                                                                                                                         |                                                                                        |
|---------------------------------------------|-------------------|----------------------------|----------------------------------------------|-------------------------------------------------------------------------------|----------------------|---------------------------------------------------------------------------------------------------------------------------------------------------------------------------------------------------------------------------|--------------------------|-------------------------------------------------------------------------------------------------------------------------------------------------------------------------------------------------------------------------|----------------------------------------------------------------------------------------|
| News by Mulder[59]                          | Event 22 Mar 2014 | Hospital in New York       | E-cigarette                                  | User in hospital was wearing nasal cannula oxygen.<br><br>Loud pop was heard. | Fire during use.     | Patient had e-cigarette in her mouth and was using oxygen when fire started. First- and second- degree burns "from ear to ear." "Patient was in shock." Stabilized in intensive care, then hospitalized in a burn center. | Unknown age, Female User | Staff observed fire around patient's nose and shooting out the end of a hose connected to wall outlet oxygen.<br><br>Facial flames were extinguished in less than 1 minute using a blanket and the oxygen was shut off. | Proximate oxygen                                                                       |
| News: Cigarette charger blamed for fire[60] | Event 7 May 2014  | Home Kitchen in California | Rechargeable e-cigarette<br><br>Wall charger | Product placed on charge, and unattended for unspecified duration.            | Fire while charging. | Two people evacuated with no injuries.                                                                                                                                                                                    | Unknown                  | Home full of heavy black smoke.<br><br>Damage to structure was ~ \$5000 USD. Damage to contents was ~\$200 USD.                                                                                                         | Firefighters said e-cigarette was plugged into an outlet near other combustible items. |

**Table S2: Summary of 92 Electronic Nicotine Delivery System Overheating/Fire/Explosion Events in the U.S.**

| *Recipient by Reporter [in-text reference number] | Date | Event Setting in State | Product(s) | Precedent Activities and Perceived Harbingers | Event Type or Description | Injury or Health Effect | Affected or Involved's Age in Years, Gender, User Status (when known) | Fire or Property Damage Description and Control Measures | Postulated Cause(s) and Response(s) |
|---------------------------------------------------|------|------------------------|------------|-----------------------------------------------|---------------------------|-------------------------|-----------------------------------------------------------------------|----------------------------------------------------------|-------------------------------------|
|---------------------------------------------------|------|------------------------|------------|-----------------------------------------------|---------------------------|-------------------------|-----------------------------------------------------------------------|----------------------------------------------------------|-------------------------------------|

|                                                                  |                   |                              |                                              |                                                                                             |                                            |                                                                                                                                                                                 |                                                            |                                                                                                                                                              |                                                                |
|------------------------------------------------------------------|-------------------|------------------------------|----------------------------------------------|---------------------------------------------------------------------------------------------|--------------------------------------------|---------------------------------------------------------------------------------------------------------------------------------------------------------------------------------|------------------------------------------------------------|--------------------------------------------------------------------------------------------------------------------------------------------------------------|----------------------------------------------------------------|
| News: E-cigarette charger sparks OKC home fire; woman burned[61] | Event 3 Jul 2014  | Home bedroom in Oklahoma     | Rechargeable e-cigarette                     | Unknown                                                                                     | Fire                                       | Burn to hand while trying to extinguish the fire.                                                                                                                               | Unknown age, Female                                        | Bedroom, furniture and parts of back porch burned.<br><br>Occupant was unable to extinguish "rapidly spreading fire."<br>Damages estimated at ~\$75,000 USD. | Unknown                                                        |
| News by Mendoza[62]                                              | Event 28 Sep 2014 | Apartment kitchen in Hawaii  | Rechargeable e-cigarette<br><br>Wall charger | Product placed on charge per instructions for two hours , before event, and was unattended. | Explosion while charging followed by Fire. | No injuries                                                                                                                                                                     | Unknown age, Female User                                   | Projectile ignited paper bag and lunch box on kitchen counter, as well as countertop.<br><br>Occupant extinguished fire.                                     | Firefighters confirmed e-cigarette was the source of the fire. |
| News by Chen[63]                                                 | Event 11 Nov 2014 | Six-unit house in Washington | Electronic cigarette                         | Unknown                                                                                     | Explosion followed by Fire.                | Five people were evacuated. User, who needed a walker for ambulation, suffered hand burns.<br><br>One person hospitalized in critical condition for smoke inhalation and burns. | Unknown age, Female User;<br><br>Unknown age, Male Nonuser | User said product projectiles ignited her couch in first floor unit.<br><br>Fire crews described flames seen "through the upper floor" upon arrival.         | Unknown                                                        |

**Table S2: Summary of 92 Electronic Nicotine Delivery System Overheating/Fire/Explosion Events in the U.S.**

| *Recipient by Reporter [in-text reference number] | Date | Event Setting in State | Product(s) | Precedent Activities and Perceived Harbingers | Event Type or Description | Injury or Health Effect | Affected or Involved's Age in Years, Gender, User Status (when known) | Fire or Property Damage Description and Control Measures | Postulated Cause(s) and Response(s) |
|---------------------------------------------------|------|------------------------|------------|-----------------------------------------------|---------------------------|-------------------------|-----------------------------------------------------------------------|----------------------------------------------------------|-------------------------------------|
|---------------------------------------------------|------|------------------------|------------|-----------------------------------------------|---------------------------|-------------------------|-----------------------------------------------------------------------|----------------------------------------------------------|-------------------------------------|

|                             |                   |                                                           |                                                                                    |                                                                                                                  |                                                    |                                                        |                        |                                                                                                                           |                                                                                                                                                                                                                                                                              |
|-----------------------------|-------------------|-----------------------------------------------------------|------------------------------------------------------------------------------------|------------------------------------------------------------------------------------------------------------------|----------------------------------------------------|--------------------------------------------------------|------------------------|---------------------------------------------------------------------------------------------------------------------------|------------------------------------------------------------------------------------------------------------------------------------------------------------------------------------------------------------------------------------------------------------------------------|
| News by Bechtel[64]         | Event 17 Dec 2014 | Home in Ohio                                              | Rechargeable e-cigarette<br><br>Cell phone charger                                 | Product placed on charge for unspecified duration.                                                               | Fire while charging.                               | No injuries                                            | Unknown                | Curtains near outlet ignited. Fire spread to couch.<br><br>Property had minor smoke damage. Estimated damages \$1000 USD. | Fire investigator said charger was not compatible with e-cigarette.                                                                                                                                                                                                          |
| News by Baker[65]           | Event year 2014   | Batteries carried in pants pocket while outdoors in Texas | E-cigarette<br><br>Rechargeable "lithium-ion high-drain batteries" for e-cigarette | Playing kickball with batteries in front pocket of shorts - no direct impact of ball to pocket and no loud noise | Battery explosion while wearing, followed by Fire. | First- and second-degree burns of thighs and genitals. | Unknown age, Male User | "Hot fizzing...explosion... with sparks shooting from ...crotch area"                                                     | Lawsuit alleges retailer sold product that was "unreasonably dangerous" and "failed to conform to the applicable design standards and specifications."<br><br>Retailer began selling safety storage boxes for batteries and informing customers how to handle the batteries. |
| News by Corona & Marcus[66] | Event 12 Jan 2015 | High School Gym in Nevada                                 | Electronic cigarette                                                               | Two students were "messaging with the e-cigarette."                                                              | "Minor" explosion.                                 | No information                                         | Unknown                | School evacuated.                                                                                                         | Event was determined to be accidental.                                                                                                                                                                                                                                       |

**Table S2: Summary of 92 Electronic Nicotine Delivery System Overheating/Fire/Explosion Events in the U.S.**

| *Recipient by Reporter [in-text reference number] | Date | Event Setting in State | Product(s) | Precedent Activities and Perceived Harbingers | Event Type or Description | Injury or Health Effect | Affected or Involved's Age in Years, Gender, User Status (when known) | Fire or Property Damage Description and Control Measures | Postulated Cause(s) and Response(s) |
|---------------------------------------------------|------|------------------------|------------|-----------------------------------------------|---------------------------|-------------------------|-----------------------------------------------------------------------|----------------------------------------------------------|-------------------------------------|
|---------------------------------------------------|------|------------------------|------------|-----------------------------------------------|---------------------------|-------------------------|-----------------------------------------------------------------------|----------------------------------------------------------|-------------------------------------|

|                               |                   |                            |                                          |                                                    |                                            |                                                                                                                                                 |                     |                                                                                        |                                                                                                                                                                                                                                    |
|-------------------------------|-------------------|----------------------------|------------------------------------------|----------------------------------------------------|--------------------------------------------|-------------------------------------------------------------------------------------------------------------------------------------------------|---------------------|----------------------------------------------------------------------------------------|------------------------------------------------------------------------------------------------------------------------------------------------------------------------------------------------------------------------------------|
| News by Powell[67]            | Event 14 Jan 2015 | Home in Tennessee          | Rechargeable e-cigarette<br>Wall charger | Product placed on charge for unspecified duration. | Explosion while charging followed by Fire. | No information                                                                                                                                  | Unknown age, Female | Home caught fire.<br>Occupant extinguished flames.                                     | Local e-cigarette retailer stated that they "...check all the devices they sell for quality...and go through a full demonstration on how the device works, how to maintain it, how to clean it, how to fill it, how to charge it." |
| News by Fox5 Digital Team[68] | Event 8 Feb 2015  | Liquor store in California | Electronic cigarette                     | Unknown                                            | Explosion followed by Fire.                | Store employee hospitalized in critical condition at a burn center with facial burns and lacerations after product exploded in employee's face. | Unknown age, Male   | Store was damaged.<br>Projectiles shattered a glass display.<br>Authorities responded. | Unknown                                                                                                                                                                                                                            |
| News by Hernandez [69]        | Event 10 Feb 2015 | Home in California         | E-cigarette                              | User was holding the product                       | Explosion followed by Fire.                | Lacerations and burns to hand                                                                                                                   | 17, Male            | Projectiles burned a hole in the wall and carpet.                                      | Unknown                                                                                                                                                                                                                            |



**Table S2: Summary of 92 Electronic Nicotine Delivery System Overheating/Fire/Explosion Events in the U.S.**

| *Recipient by Reporter [in-text reference number]                                               | Date                 | Event Setting in State                       | Product(s)                                                      | Precedent Activities and Perceived Harbingers                                                                                                                         | Event Type or Description                                               | Injury or Health Effect                                                                                       | Affected or Involved's Age in Years, Gender, User Status (when known) | Fire or Property Damage Description and Control Measures                                                                                               | Postulated Cause(s) and Response(s)                                                                       |
|-------------------------------------------------------------------------------------------------|----------------------|----------------------------------------------|-----------------------------------------------------------------|-----------------------------------------------------------------------------------------------------------------------------------------------------------------------|-------------------------------------------------------------------------|---------------------------------------------------------------------------------------------------------------|-----------------------------------------------------------------------|--------------------------------------------------------------------------------------------------------------------------------------------------------|-----------------------------------------------------------------------------------------------------------|
| <p>News by Scripps Media, Inc.[70]</p> <p>News by 13WHAM [71]</p> <p>News by Horvatits [72]</p> | Event 4 Mar 2015[72] | Apartment in New York[72]                    | <p>E-cigarette [70,71,72]</p> <p>Nickel cadmium battery[70]</p> | Product placed on charge for unspecified duration and had just finished a full charge.[71] Thirty seconds after inserting battery to device, it started sizzling.[72] | Explosion while being tossed from user's hand[71] followed Fire.[70,72] | <p>Hand laceration treated by paramedics.[70,71]</p> <p>Six stitches placed to treat hand laceration.[72]</p> | 23, Male User[72]                                                     | <p>Small fire.[72]</p> <p>Burn damage to carpet.[70]</p> <p>Projectile ("end cap of e-cig") lodged in wall.[70,71]</p>                                 | Firefighters stated that either the wrong battery was used or the battery was inserted the wrong way.[72] |
| <p>News by Rocha[73]</p> <p>News by Duranty[74]</p>                                             | Event 9 Mar 2015[74] | Apartment bedroom [74] in California [73,74] | Modified e-cigarette[73]                                        | Product hummed during use and user was pulling it away from his face.[73,74]                                                                                          | Explosion during use followed by Fire.[73,74]                           | <p>"Flash burns" to face and hand, and hand lacerations. [73,74]</p> <p>Examined at local hospital.[74]</p>   | 20's, Male, User[73,74]                                               | <p>Small fire.[74]</p> <p>Projectiles lodged in ceiling and on bed, igniting items on bed. [73]</p> <p>Occupant extinguished fire using water.[73]</p> | Unknown[73,74]                                                                                            |

**Table S2: Summary of 92 Electronic Nicotine Delivery System Overheating/Fire/Explosion Events in the U.S.**

| *Recipient by Reporter [in-text reference number] | Date | Event Setting in State | Product(s) | Precedent Activities and Perceived Harbingers | Event Type or Description | Injury or Health Effect | Affected or Involved's Age in Years, Gender, User Status (when known) | Fire or Property Damage Description and Control Measures | Postulated Cause(s) and Response(s) |
|---------------------------------------------------|------|------------------------|------------|-----------------------------------------------|---------------------------|-------------------------|-----------------------------------------------------------------------|----------------------------------------------------------|-------------------------------------|
|---------------------------------------------------|------|------------------------|------------|-----------------------------------------------|---------------------------|-------------------------|-----------------------------------------------------------------------|----------------------------------------------------------|-------------------------------------|

|                      |                       |                                                              |                                                                                                                    |                                                                                                                                                                                                                |                                           |                                                                                                                                                                                      |                          |                                                          |                                                                                                                                                                                                                                                                  |
|----------------------|-----------------------|--------------------------------------------------------------|--------------------------------------------------------------------------------------------------------------------|----------------------------------------------------------------------------------------------------------------------------------------------------------------------------------------------------------------|-------------------------------------------|--------------------------------------------------------------------------------------------------------------------------------------------------------------------------------------|--------------------------|----------------------------------------------------------|------------------------------------------------------------------------------------------------------------------------------------------------------------------------------------------------------------------------------------------------------------------|
| News by Lodor[75]    | Report 28 Apr 2015    | Home in New Jersey                                           | E-cigarette<br><br>USB cellphone charger                                                                           | Product placed on charge for unspecified duration.                                                                                                                                                             | Fire and Explosion while charging.        | No information                                                                                                                                                                       | Unknown age, Female User | Char marks in the kitchen                                | Firefighters determined that the wrong charger had been used because it looked identical to the e-cigarette charger and fit the same way.                                                                                                                        |
| News by Boggs[76]    | Report 22 May 2015    | Product image appears irrelevant as it is an intact product. | "Vapor smoker or e-cigarette"                                                                                      | Unknown                                                                                                                                                                                                        | Explosion during use .                    | Text has no information. Full face images show apparent burns to both lips, central tongue and palate. Hands are not shown.                                                          | Unknown                  | Unknown                                                  | Unknown                                                                                                                                                                                                                                                          |
| News by Dewberry[77] | Event month June 2015 | Restaurant in Texas                                          | E-cigarette extra batteries (purple cylindrical lithium-ion, manufactured, in China's Guangdong Province by EFEST) | User carried e-cigarette in one hand and extra batteries with keys in a pocket. While waiting in line user heard a sound "like a fuse going off, then saw "flames like fireworks... shooting out of my pants." | Explosion followed by Fire while wearing. | Second and third degree burns with "excruciating pain." "I can't walk because the burn is on top of my muscle on my thigh." As of September, 2015, the leg had not completely healed | 21, Male User            | Pants were singed with a hole burned through the pocket. | User complained that no instructions came with the batteries.<br><br>Manufacturer stated that the keys and battery contacted, causing a short circuit. Manufacturer has had similar reports, posted a warning on its website, and sells a battery carrying case. |

**Table S2: Summary of 92 Electronic Nicotine Delivery System Overheating/Fire/Explosion Events in the U.S.**

| *Recipient by Reporter [in-text reference number] | Date | Event Setting in State | Product(s) | Precedent Activities and Perceived Harbingers | Event Type or Description | Injury or Health Effect | Affected or Involved's Age in Years, Gender, User Status (when known) | Fire or Property Damage Description and Control Measures | Postulated Cause(s) and Response(s) |
|---------------------------------------------------|------|------------------------|------------|-----------------------------------------------|---------------------------|-------------------------|-----------------------------------------------------------------------|----------------------------------------------------------|-------------------------------------|
|---------------------------------------------------|------|------------------------|------------|-----------------------------------------------|---------------------------|-------------------------|-----------------------------------------------------------------------|----------------------------------------------------------|-------------------------------------|

|                                                                      |                   |                          |                                      |                                                                                                                                                                                                        |                                                                                               |                                                                                          |                        |                       |                                                                                                                                                       |
|----------------------------------------------------------------------|-------------------|--------------------------|--------------------------------------|--------------------------------------------------------------------------------------------------------------------------------------------------------------------------------------------------------|-----------------------------------------------------------------------------------------------|------------------------------------------------------------------------------------------|------------------------|-----------------------|-------------------------------------------------------------------------------------------------------------------------------------------------------|
| News: Austin man says e-cigarette battery exploded in his pocket[78] | Event 30 Jun 2015 | Auto Glass Shop in Texas | E-cigarette lithium ion battery VTC5 | User carried an extra battery in a pants pocket while installing an auto windshield. He felt a vibration in the pocket, then heard a hissing sound "like a firecracker" then felt a burning sensation. | Explosion while wearing.<br><br>Removing the pants, user saw a chemical spilled over his leg. | The area is painful and impedes walking. User was unable to work for at least one month. | Unknown age, Male User | No fire is described. | An attorney identified the battery as resembling one made by a "well-known electronics company." The attorney believes the battery was a counterfeit. |
|----------------------------------------------------------------------|-------------------|--------------------------|--------------------------------------|--------------------------------------------------------------------------------------------------------------------------------------------------------------------------------------------------------|-----------------------------------------------------------------------------------------------|------------------------------------------------------------------------------------------|------------------------|-----------------------|-------------------------------------------------------------------------------------------------------------------------------------------------------|

**Table S2: Summary of 92 Electronic Nicotine Delivery System Overheating/Fire/Explosion Events in the U.S.**

| *Recipient by Reporter [in-text reference number] | Date              | Event Setting in State | Product(s)  | Precedent Activities and Perceived Harbingers | Event Type or Description | Injury or Health Effect                                                                                                                                                                                                                                                                                                                                                                                                                    | Affected or Involved's Age in Years, Gender, User Status (when known) | Fire or Property Damage Description and Control Measures                 | Postulated Cause(s) and Response(s)                           |
|---------------------------------------------------|-------------------|------------------------|-------------|-----------------------------------------------|---------------------------|--------------------------------------------------------------------------------------------------------------------------------------------------------------------------------------------------------------------------------------------------------------------------------------------------------------------------------------------------------------------------------------------------------------------------------------------|-----------------------------------------------------------------------|--------------------------------------------------------------------------|---------------------------------------------------------------|
| News by Pan[79]                                   | Event 29 Jul 2015 | Unknown in Georgia     | E-cigarette | Unknown                                       | Explosion during use.     | <p>User has little memory of the event. First degree burns of the face and chest, burns to hand and cornea, fractured neck and finger, dime-sized hole in roof of mouth with damage to upper and lower teeth with upper tooth displaced fully into the gum.</p> <p>Air transported to burn unit for 7 days' intensive care.</p> <p>Six weeks after event user spoke with a lisp, was unable to eat solid food, and lived with parents.</p> | 23, Male User                                                         | <p>Firefighters responded.</p> <p>No information on property damage.</p> | Firefighters investigated the event and retained the product. |

**Table S2: Summary of 92 Electronic Nicotine Delivery System Overheating/Fire/Explosion Events in the U.S.**

| *Recipient by Reporter [in-text reference number] | Date | Event Setting in State | Product(s) | Precedent Activities and Perceived Harbingers | Event Type or Description | Injury or Health Effect | Affected or Involved's Age in Years, Gender, User Status (when known) | Fire or Property Damage Description and Control Measures | Postulated Cause(s) and Response(s) |
|---------------------------------------------------|------|------------------------|------------|-----------------------------------------------|---------------------------|-------------------------|-----------------------------------------------------------------------|----------------------------------------------------------|-------------------------------------|
|---------------------------------------------------|------|------------------------|------------|-----------------------------------------------|---------------------------|-------------------------|-----------------------------------------------------------------------|----------------------------------------------------------|-------------------------------------|

|                     |                   |                  |                                                                     |                  |                                    |                                                                                                                         |                        |                                          |                                                                                                                                                                                                                                                                                                                                      |
|---------------------|-------------------|------------------|---------------------------------------------------------------------|------------------|------------------------------------|-------------------------------------------------------------------------------------------------------------------------|------------------------|------------------------------------------|--------------------------------------------------------------------------------------------------------------------------------------------------------------------------------------------------------------------------------------------------------------------------------------------------------------------------------------|
| News by Wimbley[80] | Report 3 Aug 2015 | Home in Michigan | Pharaoh vapor pen (“like an e-cigarette”) made by a Chinese company | “I pushed it...” | Explosion while using the product. | User was hospitalized with a scorched arm and burned abdomen. His thumb contains shrapnel and he may have nerve damage. | Unknown age, Male User | Device projectile put holes in the wall. | User complained of no warnings on packaging, considered legal action, and regarded the long-term health risks of combusted cigarettes as safer than the short-term explosion risk of e-cigarettes.<br><br>News reporter was unsuccessful in contacting the manufacturer.<br><br>News reporter notified Congresswoman Debbie Dingell. |
|---------------------|-------------------|------------------|---------------------------------------------------------------------|------------------|------------------------------------|-------------------------------------------------------------------------------------------------------------------------|------------------------|------------------------------------------|--------------------------------------------------------------------------------------------------------------------------------------------------------------------------------------------------------------------------------------------------------------------------------------------------------------------------------------|

**Events Reported to the United States Department of Transportation/Federal Aviation Administration**

|                  |             |                                  |                                            |                                    |      |                |                |                                                                                                  |         |
|------------------|-------------|----------------------------------|--------------------------------------------|------------------------------------|------|----------------|----------------|--------------------------------------------------------------------------------------------------|---------|
| FAA by FedEx[81] | 13 Aug 2009 | Airplane cargo hold in Minnesota | E-cigarette<br><br>Lithium metal batteries | Air shipment and airplane landing. | Fire | No information | Not applicable | Fire warning light alerted crew.<br><br>Numerous packages were found with smoke and fire damage. | Unknown |
|------------------|-------------|----------------------------------|--------------------------------------------|------------------------------------|------|----------------|----------------|--------------------------------------------------------------------------------------------------|---------|

**Table S2: Summary of 92 Electronic Nicotine Delivery System Overheating/Fire/Explosion Events in the U.S.**

| *Recipient by Reporter [in-text reference number]                                                                                               | Date                       | Event Setting in State                                        | Product(s)                                                           | Precedent Activities and Perceived Harbingers | Event Type or Description | Injury or Health Effect     | Affected or Involved's Age in Years, Gender, User Status (when known) | Fire or Property Damage Description and Control Measures                                                                                                                                                                                                                                                         | Postulated Cause(s) and Response(s)                                                                                                                                                                                                                        |
|-------------------------------------------------------------------------------------------------------------------------------------------------|----------------------------|---------------------------------------------------------------|----------------------------------------------------------------------|-----------------------------------------------|---------------------------|-----------------------------|-----------------------------------------------------------------------|------------------------------------------------------------------------------------------------------------------------------------------------------------------------------------------------------------------------------------------------------------------------------------------------------------------|------------------------------------------------------------------------------------------------------------------------------------------------------------------------------------------------------------------------------------------------------------|
| FAA by DHL [82]                                                                                                                                 | 25 Feb 2014                | Cargo air shipment sort center in Kentucky                    | E-cigarettes originating from Hong Kong<br><br>Lithium ion batteries | International air shipment                    | Fire                      | No information              | Not applicable                                                        | 25 e-cigarettes in bubble wrap packaging were discovered charred and melted - "damaged by fire."                                                                                                                                                                                                                 | Device damage prevented full evaluation.<br><br>Shipping documents had inaccurate information about contents.                                                                                                                                              |
| FAA by JetBlue[83]<br><br>CPSC[Letter from Fire Marshal to CPSC Chairman. Report date 15 Oct 2014. Unpublished data]<br><br>News by Marcelo[84] | Incident [CPSC] 9 Aug 2014 | Passenger airplane baggage hold in Massachusetts[ CPSC,83,84] | Electronic cigarette<br><br>Lithium ion battery[83]                  | Checked and loaded bag. [CPSC,83, 84]         | Fire [CPSC,83,84]         | No information [CPSC,83,84] | Not applicable                                                        | Bag was emitting smoke, so removed from aircraft bin and put on ground. Fire extinguisher not successful in putting out fire. Source identified as electronic cigarette which continued to bum after removed from bag - then extinguished with fire extinguisher.[83]<br><br>Airplane evacuation took place.[84] | Investigation determined event was accidental due to battery-operated atomizer device activation and heating to at least 212°F.[CPSC]<br><br>Fire Marshal reported to CPSC his concern that devices can be turned on during normal luggage handling.[CPSC] |

**Table S2: Summary of 92 Electronic Nicotine Delivery System Overheating/Fire/Explosion Events in the U.S.**

| *Recipient by Reporter [in-text reference number]            | Date        | Event Setting in State                        | Product(s)                                         | Precedent Activities and Perceived Harbingers                                                                            | Event Type or Description                  | Injury or Health Effect | Affected or Involved's Age in Years, Gender, User Status (when known) | Fire or Property Damage Description and Control Measures                                                                                                              | Postulated Cause(s) and Response(s)                                                            |
|--------------------------------------------------------------|-------------|-----------------------------------------------|----------------------------------------------------|--------------------------------------------------------------------------------------------------------------------------|--------------------------------------------|-------------------------|-----------------------------------------------------------------------|-----------------------------------------------------------------------------------------------------------------------------------------------------------------------|------------------------------------------------------------------------------------------------|
| FAA by Transportation Safety Administration for SkyWest [85] | 4 Jan 2015  | Airport in California                         | E-cigarette vaporizer<br><br>Lithium ion battery   | Product stored in checked passenger baggage.                                                                             | Overheating while stored followed by Fire. | No information          | Not applicable                                                        | Checked bag missed its flight and was observed to be on fire while sitting in the airport "make-up" area.<br><br>Airport staff extinguished fire and notified police. | Police determined the likely cause was the e-cigarette overheating and burning inside the bag. |
| FAA by Southwest [86]                                        | 10 Jun 2015 | Passenger airplane baggage hold in New Mexico | E-cig and two spare 3.7 volt lithium ion batteries | E-cig and spare batteries were in a checked passenger bag during a flight and discovered during offloading after landing | Overheating and Fire while stowed.         | No information          | Not applicable                                                        | The bag "was smoking as it was offloaded" from the plane.                                                                                                             | "One of the batteries was not protected from short circuit causing burning and smoke."         |

**Table S2: Summary of 92 Electronic Nicotine Delivery System Overheating/Fire/Explosion Events in the U.S.**

| *Recipient by Reporter [in-text reference number] | Date | Event Setting in State | Product(s) | Precedent Activities and Perceived Harbingers | Event Type or Description | Injury or Health Effect | Affected or Involved's Age in Years, Gender, User Status (when known) | Fire or Property Damage Description and Control Measures | Postulated Cause(s) and Response(s) |
|---------------------------------------------------|------|------------------------|------------|-----------------------------------------------|---------------------------|-------------------------|-----------------------------------------------------------------------|----------------------------------------------------------|-------------------------------------|
|---------------------------------------------------|------|------------------------|------------|-----------------------------------------------|---------------------------|-------------------------|-----------------------------------------------------------------------|----------------------------------------------------------|-------------------------------------|

|                                                            |                   |                                  |             |                                                           |                                       |                |                     |                                                                                                                   |                                                                                                                    |
|------------------------------------------------------------|-------------------|----------------------------------|-------------|-----------------------------------------------------------|---------------------------------------|----------------|---------------------|-------------------------------------------------------------------------------------------------------------------|--------------------------------------------------------------------------------------------------------------------|
| FAA by Flight Attendant [Report 1263077. Unpublished data] | Report 9 Jul 2015 | Airport terminal after deplaning | E-cigarette | Product was carried on in a purse for an airplane flight. | Overheating during air transportation | No information | Unknown age, Female | Passenger was observed "...dealing with a smoldering e-cigarette in her purse...that had melted several items..." | Passenger stated "the safety was off on the e-cigarette and it had generated enough heat to melt several items..." |
|------------------------------------------------------------|-------------------|----------------------------------|-------------|-----------------------------------------------------------|---------------------------------------|----------------|---------------------|-------------------------------------------------------------------------------------------------------------------|--------------------------------------------------------------------------------------------------------------------|

**Events reported to the United States Food and Drug Administration**

|                                 |                   |                            |                                                    |         |                                                                                                                         |                                                                                                                                                                                                                                                                        |                        |                                     |                                                                                                                                                                  |
|---------------------------------|-------------------|----------------------------|----------------------------------------------------|---------|-------------------------------------------------------------------------------------------------------------------------|------------------------------------------------------------------------------------------------------------------------------------------------------------------------------------------------------------------------------------------------------------------------|------------------------|-------------------------------------|------------------------------------------------------------------------------------------------------------------------------------------------------------------|
| FDA by healthcare provider [87] | Event 27 Jun 2011 | Moving Car in California   | Titanium Innovations Lithium battery (CR123a 3.0v) | Unknown | Explosion in mouth during use.                                                                                          | Second degree burns of face, mouth and one eye injured. Care in emergency room, followed by treatment at burn center.                                                                                                                                                  | 38, Male User          | Unknown                             | User stated he tried to recharge a non-rechargeable replacement battery.                                                                                         |
| FDA by user[88]                 | Event 17 Jun 2012 | Unknown setting in Florida | V2 cigs (medium) cartridges                        | Unknown | Cartridges overheated quickly during use after just a few puffs. Switching cartridges several times had the same issue. | Nausea and chest rash after two days' use, followed by "violent vomiting" with five more days' continued use. Emergency room visit, with diagnosis of nicotine overdose and identified trace diethylene glycol in blood. Tests underway for liver and kidney function. | Unknown age, Male User | No fire or explosion are described. | Cause of overheating not reported.<br><br>Doctors attributed symptoms to nicotine overdose related to e-cigarette use.<br><br>User decided to sue "the company." |



**Table S2: Summary of 92 Electronic Nicotine Delivery System Overheating/Fire/Explosion Events in the U.S.**

| *Recipient by Reporter [in-text reference number]                                      | Date                  | Event Setting in State          | Product(s)                                                                        | Precedent Activities and Perceived Harbingers                                       | Event Type or Description                             | Injury or Health Effect                                                                                                | Affected or Involved's Age in Years, Gender, User Status (when known) | Fire or Property Damage Description and Control Measures                                                                                                                                             | Postulated Cause(s) and Response(s)                                                                                   |
|----------------------------------------------------------------------------------------|-----------------------|---------------------------------|-----------------------------------------------------------------------------------|-------------------------------------------------------------------------------------|-------------------------------------------------------|------------------------------------------------------------------------------------------------------------------------|-----------------------------------------------------------------------|------------------------------------------------------------------------------------------------------------------------------------------------------------------------------------------------------|-----------------------------------------------------------------------------------------------------------------------|
| FDA by user[89]                                                                        | Event 2 May 2013      | Home in Texas                   | Rechargeable Super Vapor EGO-T E-Cig                                              | Had used the product for 11 days.<br><br>Product placed on charge for 90 minutes.   | Explosion while charging followed by Fire.            | Medical care for first-, second-, and third-degree burns on arm, elbow, hip, buttock & ankle, with permanent scarring. | 25, Female User                                                       | Projectile flew 15 feet. Burn spots present on couch and rug.<br><br>Occupants extinguished fire.                                                                                                    | Investigator unable to identify product manufacturer & closed investigation with "insufficient information."          |
| FDA by spouse of user[90]                                                              | Event 29 May 2013     | Home in Utah                    | Rechargeable liquid White Rhino by White Rhino                                    | Product placed on charge for unspecified duration.<br><br>Loud bang.                | Explosion while charging followed by Fire.            | No injuries                                                                                                            | 37, Male User                                                         | Projectile started hallway fire.                                                                                                                                                                     | Unknown                                                                                                               |
| FDA by healthcare provider [91]<br><br>News by Kulwicki [92]<br><br>News by McFall[40] | Event 20 Sep 2013[91] | Occupied moving car in Utah[91] | White Rhino e-cigarette [91,92]<br><br>USB car charger (original charger) [40,92] | Product placed on charge for unspecified duration. [91,92]<br><br>Strange smell[92] | Explosion while charging followed by Fire. [40,91,92] | First- and second- degree burns[92] to left elbow, left flank, and left buttocks.[91]                                  | 3, Male Nonuser [40,91,92]                                            | Projectile(device coils) ricocheted off car ceiling and into rear car seat where child was restrained, igniting his clothing.[40,91,92]<br><br>Fire extinguished by mother using iced coffee.[40,91] | User planned never to buy another e-cigarette.[92]<br><br>Fire Marshal said the batteries overcharged and failed.[40] |

**Table S2: Summary of 92 Electronic Nicotine Delivery System Overheating/Fire/Explosion Events in the U.S.**

| *Recipient by Reporter [in-text reference number] | Date | Event Setting in State | Product(s) | Precedent Activities and Perceived Harbingers | Event Type or Description | Injury or Health Effect | Affected or Involved's Age in Years, Gender, User Status (when known) | Fire or Property Damage Description and Control Measures | Postulated Cause(s) and Response(s) |
|---------------------------------------------------|------|------------------------|------------|-----------------------------------------------|---------------------------|-------------------------|-----------------------------------------------------------------------|----------------------------------------------------------|-------------------------------------|
|---------------------------------------------------|------|------------------------|------------|-----------------------------------------------|---------------------------|-------------------------|-----------------------------------------------------------------------|----------------------------------------------------------|-------------------------------------|

|                                                                                                                                  |                  |                  |                                                                                                                                                                                                                                                                    |                                                    |                                            |                                                 |                              |                                                                                                                             |                                                                                                   |
|----------------------------------------------------------------------------------------------------------------------------------|------------------|------------------|--------------------------------------------------------------------------------------------------------------------------------------------------------------------------------------------------------------------------------------------------------------------|----------------------------------------------------|--------------------------------------------|-------------------------------------------------|------------------------------|-----------------------------------------------------------------------------------------------------------------------------|---------------------------------------------------------------------------------------------------|
| FDA by Fire Marshal [Personal communication to CTP Tobacco Product Surveillance Team. Report date 12 Nov 2013. Unpublished data] | Event 3 Nov 2013 | Home in Maryland | <p>Rechargeable EVOD from ShenZhen, China</p> <p>Suspected several wrist watch style batteries joined in series and packed with plastic wrap</p> <p>Combo style wall/USB in computer-of eGo input</p> <p>DC 5.0volt, 500ma, output</p> <p>DC 4.2 volts, 420 ma</p> | Product placed on charge for unspecified duration. | Explosion while charging followed by Fire. | No injuries despite medical oxygen in the home. | Unknown age and gender, User | <p>Projectile hit the bed, fell to carpeted floor and ignited carpet.</p> <p>Fire extinguished by occupant using water.</p> | Fire investigator identified this device as one likely involved in voluntary battery recall.[106] |
|----------------------------------------------------------------------------------------------------------------------------------|------------------|------------------|--------------------------------------------------------------------------------------------------------------------------------------------------------------------------------------------------------------------------------------------------------------------|----------------------------------------------------|--------------------------------------------|-------------------------------------------------|------------------------------|-----------------------------------------------------------------------------------------------------------------------------|---------------------------------------------------------------------------------------------------|

**Table S2: Summary of 92 Electronic Nicotine Delivery System Overheating/Fire/Explosion Events in the U.S.**

| *Recipient by Reporter [in-text reference number]                                | Date                      | Event Setting in State       | Product(s)                                                                                                                      | Precedent Activities and Perceived Harbingers          | Event Type or Description                                           | Injury or Health Effect                                                                                                                                           | Affected or Involved's Age in Years, Gender, User Status (when known) | Fire or Property Damage Description and Control Measures              | Postulated Cause(s) and Response(s)                                                   |
|----------------------------------------------------------------------------------|---------------------------|------------------------------|---------------------------------------------------------------------------------------------------------------------------------|--------------------------------------------------------|---------------------------------------------------------------------|-------------------------------------------------------------------------------------------------------------------------------------------------------------------|-----------------------------------------------------------------------|-----------------------------------------------------------------------|---------------------------------------------------------------------------------------|
| FDA by user[93]                                                                  | Event 12 Dec 2013         | Unknown setting in Arizona   | Rechargeable Brand Smoke Magnosto and Joytech pro 2 by Smok cigarette<br><br>"Ultrafire protected" lithium rechargeable battery | Unknown                                                | Explosion "while smoking" followed by Fire.                         | Cracked upper denture, fractured roof of mouth and internal nose, ignited face and sinus cavity.<br><br>Treated in burn unit for first- and second- degree burns. | 46, Male User                                                         | Unknown                                                               | Unknown                                                                               |
| FDA by user[94]                                                                  | Report 6 Feb 2014         | Unknown                      | Vista Vapors electric cigarette<br><br>Dual user with combusted cigarettes                                                      | User did not change the product in any way before use. | Overheating during repeated use episodes over a three-month period. | Altered and blackened taste buds, and yellowed teeth.<br><br>No medical care.                                                                                     | 50, Female User                                                       | Not applicable                                                        | Unknown                                                                               |
| FDA by user [Safety Reporting Portal. Report date 26 Mar 2014. Unpublished data] | Problem start 26 Mar 2014 | Unknown setting in Minnesota | Rechargeable Joytech e-go T e-cigarette                                                                                         | Product placed on charge for unspecified duration.     | Explosion while charging followed by Fire.                          | No injuries                                                                                                                                                       | 36, Female User                                                       | Projectiles and flames destroyed hardwood floors, computer, and desk. | User claimed manufacturer stated device was too damaged to identify as their product. |

**Table S2: Summary of 92 Electronic Nicotine Delivery System Overheating/Fire/Explosion Events in the U.S.**

| *Recipient by Reporter [in-text reference number] | Date | Event Setting in State | Product(s) | Precedent Activities and Perceived Harbingers | Event Type or Description | Injury or Health Effect | Affected or Involved's Age in Years, Gender, User Status (when known) | Fire or Property Damage Description and Control Measures | Postulated Cause(s) and Response(s) |
|---------------------------------------------------|------|------------------------|------------|-----------------------------------------------|---------------------------|-------------------------|-----------------------------------------------------------------------|----------------------------------------------------------|-------------------------------------|
|---------------------------------------------------|------|------------------------|------------|-----------------------------------------------|---------------------------|-------------------------|-----------------------------------------------------------------------|----------------------------------------------------------|-------------------------------------|

|                                                                                                                       |                          |                             |                                                          |                                      |                                                                                                                           |                                  |                          |                                                      |                                                    |
|-----------------------------------------------------------------------------------------------------------------------|--------------------------|-----------------------------|----------------------------------------------------------|--------------------------------------|---------------------------------------------------------------------------------------------------------------------------|----------------------------------|--------------------------|------------------------------------------------------|----------------------------------------------------|
| FDA by user's friend in Arizona [Personal communication to CTP Ombudsman. Event date not reported. Unpublished data.] | Report 30 Apr 2014       | Unknown                     | E-cigarette                                              | Unknown                              | Explosion in mouth.                                                                                                       | Burns to mouth, lips and cheeks. | Unknown age, Male User   | Unknown                                              | Unknown                                            |
| FDA by user [Safety Reporting Portal. Report date 7 Aug 2014. Unpublished data]                                       | Problem start 7 Aug 2014 | Unknown setting in Missouri | v2cig disposable e-cigarette with a red stripe around it | Product had been used for two weeks. | Overheating during one episode of use of duration " a while." "...got really hot at the end and the red light stayed on." | No injuries                      | Unknown age, Female User | Device emitted smoke and user dropped it into water. | User described that the device would not turn off. |

**Table S2: Summary of 92 Electronic Nicotine Delivery System Overheating/Fire/Explosion Events in the U.S.**

| *Recipient by Reporter [in-text reference number] | Date | Event Setting in State | Product(s) | Precedent Activities and Perceived Harbingers | Event Type or Description | Injury or Health Effect | Affected or Involved's Age in Years, Gender, User Status (when known) | Fire or Property Damage Description and Control Measures | Postulated Cause(s) and Response(s) |
|---------------------------------------------------|------|------------------------|------------|-----------------------------------------------|---------------------------|-------------------------|-----------------------------------------------------------------------|----------------------------------------------------------|-------------------------------------|
|---------------------------------------------------|------|------------------------|------------|-----------------------------------------------|---------------------------|-------------------------|-----------------------------------------------------------------------|----------------------------------------------------------|-------------------------------------|

|                                                                                                 |                           |                                       |                             |                                                                       |                      |                                                   |          |                          |                                                                                                                                            |
|-------------------------------------------------------------------------------------------------|---------------------------|---------------------------------------|-----------------------------|-----------------------------------------------------------------------|----------------------|---------------------------------------------------|----------|--------------------------|--------------------------------------------------------------------------------------------------------------------------------------------|
| FDA by physician [MedWatch. Report date 17 Apr 2015. Unpublished data]                          | Event 14 Apr 2015         | While carried in pants pocket in Ohio | Amy 260 box mod e-cigarette | Described as spontaneous event while in front pant pocket.            | Explosion            | Burn and abrasions to one entire lower extremity. | 20, Male | Unknown                  | Unknown                                                                                                                                    |
| FDA by Campus Fire Marshal [Safety Reporting Portal. Report date 20 Jun 2015. Unpublished data] | Problem start 19 Jun 2015 | Patient room in California            | E-cigarette                 | Used product was stored in a purse for 20 minutes after its last use. | Fire during storage. | No injuries                                       | 44, Male | Product ignited a purse. | Fire Marshal stated, "E-cigarette possibly exploded or was accidentally kept in the on position...Possibly stored the device incorrectly." |

**Events reported to the United States Consumer Product Safety Commission**

|                                                                                   |                      |                               |                                                           |                                 |                                                 |                                                                                              |               |                |         |
|-----------------------------------------------------------------------------------|----------------------|-------------------------------|-----------------------------------------------------------|---------------------------------|-------------------------------------------------|----------------------------------------------------------------------------------------------|---------------|----------------|---------|
| CPSC by user [SaferProducts.gov Report. Report date 1 Apr 2013. Unpublished data] | Incident 29 Mar 2013 | Unknown setting in California | Disposable E-hookah<br>Strawberry Daiquiri by LuxuryLites | Crackling noise when turned on. | Overheating during use of unspecified duration. | Inhalant extremely hot and burned inside of mouth.<br><br>No first aid or medical attention. | 22, Male User | Not applicable | Unknown |
|-----------------------------------------------------------------------------------|----------------------|-------------------------------|-----------------------------------------------------------|---------------------------------|-------------------------------------------------|----------------------------------------------------------------------------------------------|---------------|----------------|---------|

**Table S2: Summary of 92 Electronic Nicotine Delivery System Overheating/Fire/Explosion Events in the U.S.**

| *Recipient by Reporter [in-text reference number] | Date | Event Setting in State | Product(s) | Precedent Activities and Perceived Harbingers | Event Type or Description | Injury or Health Effect | Affected or Involved's Age in Years, Gender, User Status (when known) | Fire or Property Damage Description and Control Measures | Postulated Cause(s) and Response(s) |
|---------------------------------------------------|------|------------------------|------------|-----------------------------------------------|---------------------------|-------------------------|-----------------------------------------------------------------------|----------------------------------------------------------|-------------------------------------|
|---------------------------------------------------|------|------------------------|------------|-----------------------------------------------|---------------------------|-------------------------|-----------------------------------------------------------------------|----------------------------------------------------------|-------------------------------------|

|                                                                                              |                       |                                           |                                                                                                  |                                                    |                                                 |                                                                                                                          |                 |                                  |                                                                                                                                                                         |
|----------------------------------------------------------------------------------------------|-----------------------|-------------------------------------------|--------------------------------------------------------------------------------------------------|----------------------------------------------------|-------------------------------------------------|--------------------------------------------------------------------------------------------------------------------------|-----------------|----------------------------------|-------------------------------------------------------------------------------------------------------------------------------------------------------------------------|
| CPSC by healthcare provider [95]                                                             | Treatment 27 Apr 2013 | Car on Street or Highway in Unknown state | Rechargeable E-cig; car charger                                                                  | Product placed on charge for unspecified duration. | Explosion while charging followed by Fire.      | First-degree burn to unspecified site. Second-degree burn to scapula. Arm burn.<br><br>Examined or treated and released. | 19, Female User | Hair, shirt and car caught fire. | Unknown                                                                                                                                                                 |
| CPSC by user [SaferProducts.gov Report. Report date 14 Oct 2013. Unpublished data].          | Incident 18 Sep 2013  | Unknown in California                     | Disposable electric cigarette that looks like a real one, Cig20 mini                             | Unknown                                            | Explosion in mouth while inhaling.              | Saw medical professional for burn to fingers, lip, gums and stitches from recent periodontal surgery.                    | 53, Female User | Unknown                          | Unknown                                                                                                                                                                 |
| CPSC by spouse of user [SaferProducts.gov Report. Report date 24 Mar 2014. Unpublished data] | Incident 25 Nov 2013  | Home in Vermont                           | Rechargeable Metro Electronic cigarette starter kit including replaceable cartomizer, by Nicotek | Unknown                                            | Overheating during use of unspecified duration. | Burn injury with first aid by non-medical professional.                                                                  | 45, Female User | Not applicable                   | User stated "battery normally shuts off after inhaling... did not shut off and became extremely hot"<br><br>"Manufacturer sent several replacements that did not work." |

**Table S2: Summary of 92 Electronic Nicotine Delivery System Overheating/Fire/Explosion Events in the U.S.**

| *Recipient by Reporter [in-text reference number] | Date | Event Setting in State | Product(s) | Precedent Activities and Perceived Harbingers | Event Type or Description | Injury or Health Effect | Affected or Involved's Age in Years, Gender, User Status (when known) | Fire or Property Damage Description and Control Measures | Postulated Cause(s) and Response(s) |
|---------------------------------------------------|------|------------------------|------------|-----------------------------------------------|---------------------------|-------------------------|-----------------------------------------------------------------------|----------------------------------------------------------|-------------------------------------|
|---------------------------------------------------|------|------------------------|------------|-----------------------------------------------|---------------------------|-------------------------|-----------------------------------------------------------------------|----------------------------------------------------------|-------------------------------------|

|                                                                                              |                       |                          |                                                                                                                                                        |                                                                |                                            |                                                                                               |                        |                                                                                  |                                                                          |
|----------------------------------------------------------------------------------------------|-----------------------|--------------------------|--------------------------------------------------------------------------------------------------------------------------------------------------------|----------------------------------------------------------------|--------------------------------------------|-----------------------------------------------------------------------------------------------|------------------------|----------------------------------------------------------------------------------|--------------------------------------------------------------------------|
| CPSC by user [SaferProduct.s.gov Report. Report date 14 Apr 2014. Unpublished data]          | Incident 20 Dec 2013  | Home in Minnesota        | Rechargeable E-cigarette, Brand Ego-T, by Shenzhen Joyetech Co<br><br>Plugged into computer jack                                                       | Product placed on charge for 30 minutes.<br><br>Odor of smoke. | Fire while charging.                       | "Unspecified"                                                                                 | Unknown age, Male User | Unit caught on fire, melted the charger, fell on the desk, and ignited the desk. | User stated "there are no warning or instruction labels on the product." |
| CPSC by healthcare provider [Hospital report to CPSC. Unique ID 131254491. Unpublished data] | Treatment 24 Dec 2013 | Unknown                  | Electronic cigarette machine / ("Hooka")                                                                                                               | Heating oil while holding device.                              | Explosion                                  | Hand laceration when device he was holding exploded.<br><br>Examined or treated and released. | 59, Male User          | Unknown                                                                          | Unknown                                                                  |
| CPSC by user [SaferProduct.s.gov Report. Report date 14 Jan 2014. Unpublished data]          | Incident 9 Jan 2014   | Home bedroom in Oklahoma | Rechargeable e-cigarette<br><br>Vx battery, black, round, 4" long, 2 & 1/8" around by Hangzhou Weiko Info & Tech Co Ltd<br><br>USB charger in computer | Product placed on charge for unspecified duration.             | Explosion while charging followed by Fire. | No injuries                                                                                   | 70, Female User        | Projectile landed under bed and burned hardwood floors, creating fumes.          | Consumer stated there should be a warning on the batteries.              |

**Table S2: Summary of 92 Electronic Nicotine Delivery System Overheating/Fire/Explosion Events in the U.S.**

| *Recipient by Reporter [in-text reference number]                                              | Date                 | Event Setting in State            | Product(s)                                                                                                 | Precedent Activities and Perceived Harbingers                               | Event Type or Description                                                                     | Injury or Health Effect                                                                              | Affected or Involved's Age in Years, Gender, User Status (when known) | Fire or Property Damage Description and Control Measures        | Postulated Cause(s) and Response(s)                                                                                                                              |
|------------------------------------------------------------------------------------------------|----------------------|-----------------------------------|------------------------------------------------------------------------------------------------------------|-----------------------------------------------------------------------------|-----------------------------------------------------------------------------------------------|------------------------------------------------------------------------------------------------------|-----------------------------------------------------------------------|-----------------------------------------------------------------|------------------------------------------------------------------------------------------------------------------------------------------------------------------|
| CPSC by user [SaferProducts.gov. Report date 20 Feb 2014. Unpublished data]                    | Incident 15 Jan 2014 | Home kitchen in Georgia           | Recharge-able E-cigarette Ego-T (Product # 650 MAH), Brand Ego-T by Joyetech<br><br>Wall charger           | Product placed on charge for five hours.<br><br>Heard loud cracking noises. | Overheating while charging, then melting of device part and smoke emission- followed by Fire. | Spouse burned three digits when unplugging device and extinguishing fire.<br><br>No medical care.    | 26, Male Nonuser                                                      | Countertop was burned.                                          | Unknown                                                                                                                                                          |
| CPSC by user [SaferProduct s.gov Report. Report date 27 Feb 2014. Unpublished data]            | Incident 15 Nov 2013 | Unknown setting in North Carolina | Rechargeable electronic cigarette, Brand V2 Power cigarette by One Complete<br><br>USB charger in computer | Device was six weeks old.                                                   | Overheating during intermit-tent charging and “vaping” over six hours.                        | One centimeter second-degree burn of one finger from picking up device.<br><br>No medical attention. | Unknown age, Female User                                              | Not applicable                                                  | User described that the activation button did not turn off, and the device tip heated to 400+ degrees.<br><br>One replacement device malfunctioned the same way. |
| CPSC by Fire Department [SaferProduct s.gov Report. Report date 27 Feb 2014. Unpublished data] | Incident 25 Jan 2014 | Apartment in Ohio                 | Rechargeable Vaporz Ecigarette CE ROHS 2013 EGO CE4                                                        | Product placed on charge for unspecified duration.                          | Explosion while charging followed by Fire.                                                    | Injury with first aid by non-medical professional.                                                   | 50, Female                                                            | Fire and damage to apartment.<br><br>Fire department responded. | Unknown                                                                                                                                                          |



**Table S2: Summary of 92 Electronic Nicotine Delivery System Overheating/Fire/Explosion Events in the U.S.**

| *Recipient by Reporter [in-text reference number] | Date | Event Setting in State | Product(s) | Precedent Activities and Perceived Harbingers | Event Type or Description | Injury or Health Effect | Affected or Involved's Age in Years, Gender, User Status (when known) | Fire or Property Damage Description and Control Measures | Postulated Cause(s) and Response(s) |
|---------------------------------------------------|------|------------------------|------------|-----------------------------------------------|---------------------------|-------------------------|-----------------------------------------------------------------------|----------------------------------------------------------|-------------------------------------|
|---------------------------------------------------|------|------------------------|------------|-----------------------------------------------|---------------------------|-------------------------|-----------------------------------------------------------------------|----------------------------------------------------------|-------------------------------------|

|                                                                                    |                      |                     |                                                                                    |                                                                                                          |                                                                            |                                                                                                                                                                                                      |                  |                                                                                                     |                                                                                      |
|------------------------------------------------------------------------------------|----------------------|---------------------|------------------------------------------------------------------------------------|----------------------------------------------------------------------------------------------------------|----------------------------------------------------------------------------|------------------------------------------------------------------------------------------------------------------------------------------------------------------------------------------------------|------------------|-----------------------------------------------------------------------------------------------------|--------------------------------------------------------------------------------------|
| CPSC by user [SaferProducts.gov Report. Report date 28 Jan 2014. Unpublished data] | Incident 26 Jan 2014 | Unknown in Virginia | Rechargeable e-cigarette Ego (Model CE4650MAH)                                     | Product placed on charge for one hour.<br><br>Heard a pop and saw the battery unit bubbling on the side. | Overheating while charging followed by Fire when dropped after unplugging. | Friend unplugged the battery, burning hand and fingers.<br><br>First aid received by non-medical professional.                                                                                       | 24, Male Nonuser | When battery was dropped it ignited, burning carpet and sofa.<br><br>Fire extinguished using water. | Retailer offered refund, apology, and stated they would inspect remaining inventory. |
| CPSC by user [SaferProducts.gov. Report date 25 Feb 2014. Unpublished data]        | Incident 24 Feb 2014 | Home in Missouri    | Rechargeable with cartomizer<br><br>Kanger KR808D-1 battery<br><br>factory charger | Smoked brand new device once, then put it on charge for 10 minutes.                                      | Explosion while charging followed by Fire.                                 | Slight burn after projectile hit jaw area. Leg bruise from impact with desk while moving to avoid projectile. Upset by event with difficulty sleeping.<br><br>First aid by non-medical professional. | 50, Female User  | Projectile ignited carpet.<br><br>Fire extinguished by spouse.                                      | Unknown                                                                              |

**Table S2: Summary of 92 Electronic Nicotine Delivery System Overheating/Fire/Explosion Events in the U.S.**

| *Recipient by Reporter [in-text reference number] | Date | Event Setting in State | Product(s) | Precedent Activities and Perceived Harbingers | Event Type or Description | Injury or Health Effect | Affected or Involved's Age in Years, Gender, User Status (when known) | Fire or Property Damage Description and Control Measures | Postulated Cause(s) and Response(s) |
|---------------------------------------------------|------|------------------------|------------|-----------------------------------------------|---------------------------|-------------------------|-----------------------------------------------------------------------|----------------------------------------------------------|-------------------------------------|
|---------------------------------------------------|------|------------------------|------------|-----------------------------------------------|---------------------------|-------------------------|-----------------------------------------------------------------------|----------------------------------------------------------|-------------------------------------|

|                                                                                                 |                      |                                        |                                                                                                                                                  |                                                                                   |                                            |                                                  |                        |                                                                                                                                                 |                                                                                                                                                                                |
|-------------------------------------------------------------------------------------------------|----------------------|----------------------------------------|--------------------------------------------------------------------------------------------------------------------------------------------------|-----------------------------------------------------------------------------------|--------------------------------------------|--------------------------------------------------|------------------------|-------------------------------------------------------------------------------------------------------------------------------------------------|--------------------------------------------------------------------------------------------------------------------------------------------------------------------------------|
| CPSC by Fire Investigator [SaferProducts.gov Report. Report date 28 Feb 2014. Unpublished data] | Incident 28 Feb 2014 | Home in California                     | Rechargeable lithium battery used to power e-cigarettes, Brand Ego C Twist from ShenZhen Joyetech Col. LTD<br><br>USB charger in laptop computer | Product placed on charge for unspecified duration.                                | Explosion while charging followed by Fire. | No information                                   | Unknown                | Small fire with "residential damage."                                                                                                           | Unknown                                                                                                                                                                        |
| CPSC by spouse of user [SaferProducts.gov Report. Report date 24 Mar 2014. Unpublished data]    | Incident 21 Mar 2014 | Occupied parked automobile in Illinois | Rechargeable e-cigarette<br><br>Car charger                                                                                                      | Brand new device just purchased.<br><br>Product placed on charge for two minutes. | Explosion while charging followed by Fire. | Burned finger did not require medical attention. | 65, Female User        | Plastic bag nearby ignited, burning carpet and console shelves.<br><br>Fire extinguished by user with iced tea.                                 | Unknown                                                                                                                                                                        |
| CPSC by user [SaferProducts.gov Report. Report date 29 Apr 2014. Unpublished data]              | Incident 20 Apr 2014 | Home in Pennsylvania                   | Vapor E-cigarette (with nicotine)                                                                                                                | Product placed on charge for 60 minutes.                                          | Explosion while charging followed by Fire. | No injuries                                      | Unknown age, Male User | Projectile landed on floor igniting carpet and a table leg, with flames 10-12" high and black smoke.<br><br>User extinguished fire using water. | Retailer offered replacement product and requested return of damaged product, but consumer wants compensation for damages.<br><br>Wholesaler pulled back retailer's inventory. |

**Table S2: Summary of 92 Electronic Nicotine Delivery System Overheating/Fire/Explosion Events in the U.S.**

| *Recipient by Reporter [in-text reference number] | Date | Event Setting in State | Product(s) | Precedent Activities and Perceived Harbingers | Event Type or Description | Injury or Health Effect | Affected or Involved's Age in Years, Gender, User Status (when known) | Fire or Property Damage Description and Control Measures | Postulated Cause(s) and Response(s) |
|---------------------------------------------------|------|------------------------|------------|-----------------------------------------------|---------------------------|-------------------------|-----------------------------------------------------------------------|----------------------------------------------------------|-------------------------------------|
|---------------------------------------------------|------|------------------------|------------|-----------------------------------------------|---------------------------|-------------------------|-----------------------------------------------------------------------|----------------------------------------------------------|-------------------------------------|

|                                                                                            |                      |                             |                                                                          |                                                                                                                                                                                                                                |                         |             |         |                                                                                                            |                                                                                 |
|--------------------------------------------------------------------------------------------|----------------------|-----------------------------|--------------------------------------------------------------------------|--------------------------------------------------------------------------------------------------------------------------------------------------------------------------------------------------------------------------------|-------------------------|-------------|---------|------------------------------------------------------------------------------------------------------------|---------------------------------------------------------------------------------|
| CPSC by Fire Marshal [SaferProducts.gov Report. Report date 12 Aug 2014. Unpublished data] | Incident 6 Aug 2014  | Home closet in Pennsylvania | LOGIC Gold Label E-cigarette                                             | Product stored in backpack                                                                                                                                                                                                     | Fire                    | No injuries | Unknown | Small fire                                                                                                 | Fire investigator determined that the e-cigarette was the only ignition source. |
| CPSC by Friend [SaferProducts.gov Report. Report date 5 Jun 2015. Unpublished data]        | Incident 22 Apr 2015 | Bar in Arizona              | "Electronic cigarette ASIPRE CF VV BATTERY by Eigate Technology (China)" | Product purchased 26 Oct 2014. Product was on bar counter, untouched for 20 to 30 minutes, followed by "small explosion type sound", followed by "strong burning smell", followed by "spinning uncontrollable on bar counter." | Overheating while idle. | No injuries | Unknown | "Bartender removed it using a wet rag and 'cooled it down.' "<br><br>"Burn stain left on Formica bar top." | Unknown                                                                         |

**Table S2: Summary of 92 Electronic Nicotine Delivery System Overheating/Fire/Explosion Events in the U.S.**

| *Recipient by Reporter [in-text reference number] | Date | Event Setting in State | Product(s) | Precedent Activities and Perceived Harbingers | Event Type or Description | Injury or Health Effect | Affected or Involved's Age in Years, Gender, User Status (when known) | Fire or Property Damage Description and Control Measures | Postulated Cause(s) and Response(s) |
|---------------------------------------------------|------|------------------------|------------|-----------------------------------------------|---------------------------|-------------------------|-----------------------------------------------------------------------|----------------------------------------------------------|-------------------------------------|
|---------------------------------------------------|------|------------------------|------------|-----------------------------------------------|---------------------------|-------------------------|-----------------------------------------------------------------------|----------------------------------------------------------|-------------------------------------|

|                                                                                                  |                     |                                  |                                                                                           |                                                                                                                                                                |                        |                                       |                        |                                                                                       |         |
|--------------------------------------------------------------------------------------------------|---------------------|----------------------------------|-------------------------------------------------------------------------------------------|----------------------------------------------------------------------------------------------------------------------------------------------------------------|------------------------|---------------------------------------|------------------------|---------------------------------------------------------------------------------------|---------|
| CPSC by Healthcare provider [SaferProducts.gov Report. Report date 9 May 2015. Unpublished data] | Incident 9 May 2015 | Unknown setting in New Hampshire | Electronic cigarette ("Vape") battery, "Cigarella"                                        | Unknown                                                                                                                                                        | Explosion in his hand. | Injury. Seen by medical professional. | 22, Male               | Unknown                                                                               | Unknown |
| CPSC by Spouse of User [SaferProducts.gov Report. Report date 11 Jun 2015. Unpublished data]     | Incident 9 Jun 2015 | Residential garage in Oregon     | USB charger model YG1017 that connects to the battery of a vaporizer/electronic cigarette | Approximate purchase date 2 Mar 2015.<br><br>Product was placed on charge and unattended for an unspecified duration.<br><br>Resident smelled burning plastic. | Fire while charging.   | No information.                       | Unknown age, Male User | Charger was on fire.<br><br>No information on the method used to extinguish the fire. | Unknown |

**Table S2: Summary of 92 Electronic Nicotine Delivery System Overheating/Fire/Explosion Events in the U.S.**

| *Recipient by Reporter [in-text reference number] | Date | Event Setting in State | Product(s) | Precedent Activities and Perceived Harbingers | Event Type or Description | Injury or Health Effect | Affected or Involved's Age in Years, Gender, User Status (when known) | Fire or Property Damage Description and Control Measures | Postulated Cause(s) and Response(s) |
|---------------------------------------------------|------|------------------------|------------|-----------------------------------------------|---------------------------|-------------------------|-----------------------------------------------------------------------|----------------------------------------------------------|-------------------------------------|
|---------------------------------------------------|------|------------------------|------------|-----------------------------------------------|---------------------------|-------------------------|-----------------------------------------------------------------------|----------------------------------------------------------|-------------------------------------|

|                                                                                                       |                      |                    |                      |         |                       |                                                                                                                                                                                                                                                                                                                                                                                                                                                                                                                                                                                                                                                                          |               |                |         |
|-------------------------------------------------------------------------------------------------------|----------------------|--------------------|----------------------|---------|-----------------------|--------------------------------------------------------------------------------------------------------------------------------------------------------------------------------------------------------------------------------------------------------------------------------------------------------------------------------------------------------------------------------------------------------------------------------------------------------------------------------------------------------------------------------------------------------------------------------------------------------------------------------------------------------------------------|---------------|----------------|---------|
| CPSC by Healthcare Professional [SaferProducts.gov Report. Report date 24 Jul 2015. Unpublished data] | Incident 12 Jul 2015 | Home in New Mexico | Electronic cigarette | Unknown | Explosion during use. | User drove to the healthcare facility presenting with pain, painful swallowing, and no airway blockage. Exam showed upper lip swelling with a linear burn and chipped upper teeth, black "charred-like" skin wound, tenderness in the region, rapid heartbeat and no active bleeding. User was hospitalized. Imaging showed a metallic-appearing foreign body lodged near the spine with small fractures of the 1 <sup>st</sup> and 2 <sup>nd</sup> cervical vertebrae. Treatment included antibiotics, pain killer, and intravenous fluids. The foreign body was surgically removed via the mouth. User returned to work wearing a C-spine collar 9 days after surgery. | 27, Male User | No information | Unknown |
|-------------------------------------------------------------------------------------------------------|----------------------|--------------------|----------------------|---------|-----------------------|--------------------------------------------------------------------------------------------------------------------------------------------------------------------------------------------------------------------------------------------------------------------------------------------------------------------------------------------------------------------------------------------------------------------------------------------------------------------------------------------------------------------------------------------------------------------------------------------------------------------------------------------------------------------------|---------------|----------------|---------|

**Table S2: Summary of 92 Electronic Nicotine Delivery System Overheating/Fire/Explosion Events in the U.S.**

| *Recipient by Reporter [in-text reference number] | Date | Event Setting in State | Product(s) | Precedent Activities and Perceived Harbingers | Event Type or Description | Injury or Health Effect | Affected or Involved's Age in Years, Gender, User Status (when known) | Fire or Property Damage Description and Control Measures | Postulated Cause(s) and Response(s) |
|---------------------------------------------------|------|------------------------|------------|-----------------------------------------------|---------------------------|-------------------------|-----------------------------------------------------------------------|----------------------------------------------------------|-------------------------------------|
|---------------------------------------------------|------|------------------------|------------|-----------------------------------------------|---------------------------|-------------------------|-----------------------------------------------------------------------|----------------------------------------------------------|-------------------------------------|

|                                                                                     |                      |                  |                                                                                       |                                                                                                 |                                     |           |                     |                                                                                                                                                             |         |
|-------------------------------------------------------------------------------------|----------------------|------------------|---------------------------------------------------------------------------------------|-------------------------------------------------------------------------------------------------|-------------------------------------|-----------|---------------------|-------------------------------------------------------------------------------------------------------------------------------------------------------------|---------|
| CPSC by User [SaferProduct.s.gov Report. Report date 23 Jul 2015. Unpublished data] | Incident 21 Jul 2015 | Home in Colorado | Enzy "electric cigarette lighter battery"<br><br>Battery purchased from "E-vapor bar" | Product placed on charge for an unspecified duration.<br><br>Purchase date was about 4 Apr 2015 | Explosion with Fire after charging. | No injury | Unknown age, Female | The battery became a projectile and its flames burned the carpet.<br><br>Resident contained the fire using water.<br><br>There were "no extensive damages." | Unknown |
|-------------------------------------------------------------------------------------|----------------------|------------------|---------------------------------------------------------------------------------------|-------------------------------------------------------------------------------------------------|-------------------------------------|-----------|---------------------|-------------------------------------------------------------------------------------------------------------------------------------------------------------|---------|

**Events reported to the United States Coast Guard National Response Center**

|                       |                      |                                             |                                  |                                                                                        |                             |             |         |                                                                                                                                                                   |                                                     |
|-----------------------|----------------------|---------------------------------------------|----------------------------------|----------------------------------------------------------------------------------------|-----------------------------|-------------|---------|-------------------------------------------------------------------------------------------------------------------------------------------------------------------|-----------------------------------------------------|
| USCG by "caller" [96] | Incident 25 Apr 2015 | Passenger airplane upon landing in Virginia | E-cigarette with lithium battery | Product was in a passenger's carry-on bag for unspecified duration and "leaking acid." | Overheating during storage. | No injuries | Unknown | Data coded as "fire =N."<br><br>"Burned a hole through the bag. Burned the carpet." Filled the cabin with smoke.<br><br>Emergency airplane evacuation took place. | "Other" cause.<br><br>Airplane was taken "offline." |
|-----------------------|----------------------|---------------------------------------------|----------------------------------|----------------------------------------------------------------------------------------|-----------------------------|-------------|---------|-------------------------------------------------------------------------------------------------------------------------------------------------------------------|-----------------------------------------------------|

**Table S2: Summary of 92 Electronic Nicotine Delivery System Overheating/Fire/Explosion Events in the U.S.**

| *Recipient by Reporter [in-text reference number] | Date | Event Setting in State | Product(s) | Precedent Activities and Perceived Harbingers | Event Type or Description | Injury or Health Effect | Affected or Involved's Age in Years, Gender, User Status (when known) | Fire or Property Damage Description and Control Measures | Postulated Cause(s) and Response(s) |
|---------------------------------------------------|------|------------------------|------------|-----------------------------------------------|---------------------------|-------------------------|-----------------------------------------------------------------------|----------------------------------------------------------|-------------------------------------|
|---------------------------------------------------|------|------------------------|------------|-----------------------------------------------|---------------------------|-------------------------|-----------------------------------------------------------------------|----------------------------------------------------------|-------------------------------------|

|                       |                     |                                                 |                                 |                                                                               |                        |             |         |                                                            |                  |
|-----------------------|---------------------|-------------------------------------------------|---------------------------------|-------------------------------------------------------------------------------|------------------------|-------------|---------|------------------------------------------------------------|------------------|
| USCG by "caller" [97] | Incident 1 May 2015 | United Parcel Service Package Center in Florida | E-cigarettes with lithium metal | Products were packaged for an unspecified duration and ready to be delivered. | Fire while in storage. | No injuries | Unknown | Employees extinguished a small fire.<br><br>No evacuation. | "Unknown" cause. |
|-----------------------|---------------------|-------------------------------------------------|---------------------------------|-------------------------------------------------------------------------------|------------------------|-------------|---------|------------------------------------------------------------|------------------|

**Notes:**

\*For reports to more than one entity, the primary receiving entity is listed first.

**Glossary**

FAA: United States Department of Transportation/Federal Aviation Administration

FDA: United States Department of Health & Human Services/Food & Drug Administration

CPSC: United States Consumer Product Safety Commission

USCG: United States Coast Guard/National Response Center

USB = universal serial bus
